# Supplementary material for: Oligodendroglia-derived extracellular vesicles activate autophagy via LC3B/BAG3 to protect against oxidative stress with an enhanced effect for HSPB8 enriched vesicles
Source: PubMed Central journal article supplement (PMC9069805; doi:10.1186/s12964-022-00863-x), 2022-05-05
Supplement: 12964_2022_863_MOESM2_ESM.pdf [file 12964_2022_863_MOESM2_ESM.pdf]

**Additional file 1: qPCR primer sequences**

|                 | <b>Forward primer</b>    | <b>Reverse primer</b>    |
|-----------------|--------------------------|--------------------------|
| <b>HSPB8</b>    | AATGTGCACAGCTTCAAGCC     | ACAATGCCACCTTCTGCTG      |
| <b>SOD1</b>     | CTCACTCTCAGGAGACCATTGC   | CCACAAGCCAAACGACTTCCAG   |
| <b>SOD2</b>     | CTGGACAAACCTCAGCCCTAAC   | AACCTGAGCCTTGGACACCAAC   |
| <b>Caspase1</b> | GCTGTACCCCAGATTTTGTAGCA  | TCCAATAATGGACAAGTCAAGCC  |
| <b>Caspase8</b> | ATCAATCAGAAGGGAAGACAAGTT | AGTAAGCAACAAGGATGACAAGA  |
| <b>FAS</b>      | GGACCCAGAATACCAAGTGCAG   | GTTGCTGGTGAGTGTGCATTCC   |
| <b>IL1b</b>     | GGTGCTGATGTACCAGTTGGG    | CCAAAGAAGAAGATGGAAAAGC   |
| <b>TRAIL</b>    | TGGCAACTCCGTCAGCTCGTTA   | AGCTGCTACTCTCTGAGGACCT   |
| <b>FADD</b>     | TCTCCTCTCTGAGACTGCTAA    | AGAGAGTGCTGTGTGTCAATC    |
| <b>VEGFA</b>    | TTGCCTTGCTGCTCTACCTCCA   | GATGGCAGTAGCTGCGCTGATA   |
| <b>GAPDH</b>    | CGGAGTCAACGGATTTGGTCG    | AGCCTTCTCCATGGTGGTGAAGAC |
| <b>RPL13a</b>   | GCCCTACGACAAGAAAAAGCG    | TACTTCCAGCCAACCTCGTGA    |
